# Supplementary material for: Hemorrhagic Transformation in Patients With Large-artery Atherosclerotic Stroke Is Associated With Gut Microbiota and LPS-TLR4 Signaling Pathway
Source: Research Square preprint supplement (doi:10.21203/rs.3.rs-1111188/v1), 2021-11-30
Supplement: Supplementary file 1 [file 728d9d8a9a3c4184ba6d7ed3.docx]

**Fig. S1. The changes of gut microbiota and distribution of predominant taxa.**

(A). Ternary plot of OTU distribution reflecting predominant taxa across three groups at the phylum level. Each circle represents one OTU, and the size, color and position of the circle represent its relative abundance, bacterial phylum and affiliation of the OTU with the different regions, respectively. (B). Average relative abundances of bacterial phyla distributed in HC, HT, and non-HT group. Top 10 relative abundance at phylum level (average relative abundance above 1%) with significantly differential distribution (as detected by MetaStat analysis) are marked with asterisk. #P < 0.05, ##P < 0.01, ###P < 0.001 versus HC group; *P < 0.05, **P < 0.01, ***P < 0.001 versus non-HT group.

**Fig. S2.** **Cooccurrence network analysis of gut microbiota composition in HC (A), non-HT (B), and HT (C) group at the genus level.** The cooccurrence network of gut microbiota was constructed based on the correlation analysis (p < 0.05, |r|＞0.6). Red and blue lines indicate positive and negative correlations respectively between the abundances of the bacteria. The size of the circle indicates the overall abundance of the genus and the microbial taxa belonging to the same phylum have the consistent color of the circle.
